# Supplementary material for: Quantification of a mercapturate metabolite of the biocides methylisothiazolinone and chloromethylisothiazolinone (“M-12”) in human urine using online-SPE-LC/MS/MS
Source: Royal Society of Chemistry journal article supplement (doi:10.1039/d1ay00183c), 2021-01-01
Supplement: d1ay00183c2.pdf [file d1ay00183c2.pdf]

Supplemental File 1: <sup>1</sup>H-NMR spectrum of synthesized M-12

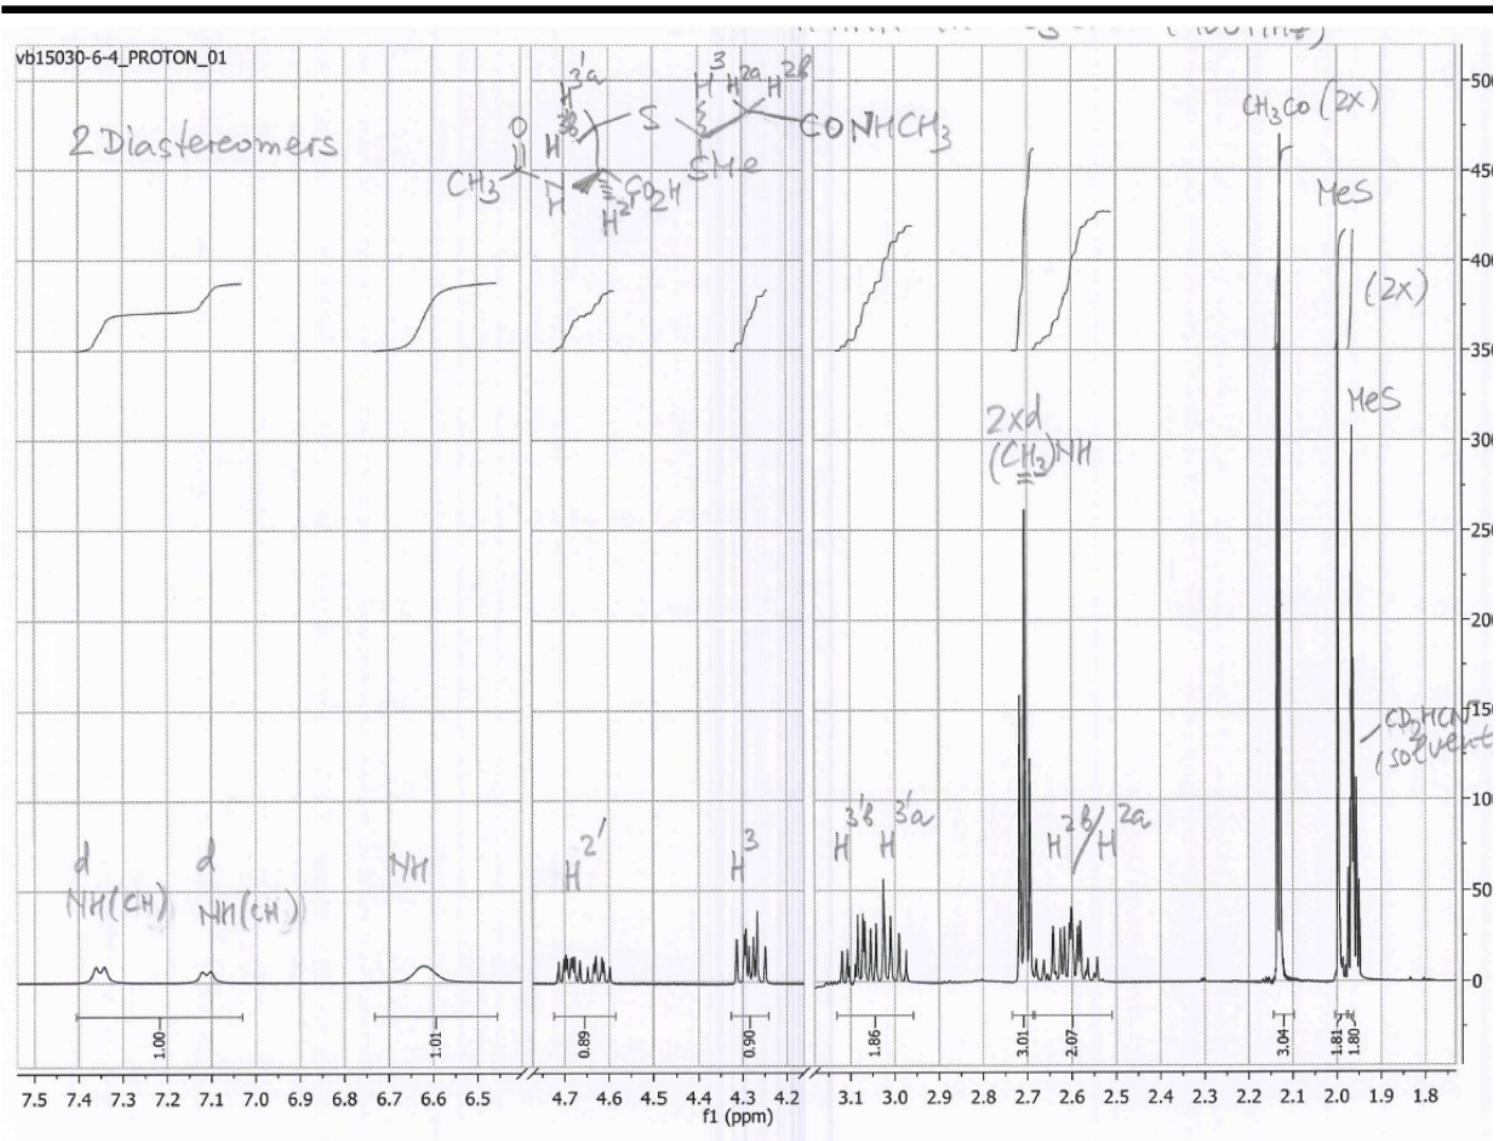

Supplemental File 2: HPLC-UV-chromatogram of synthesized M-12

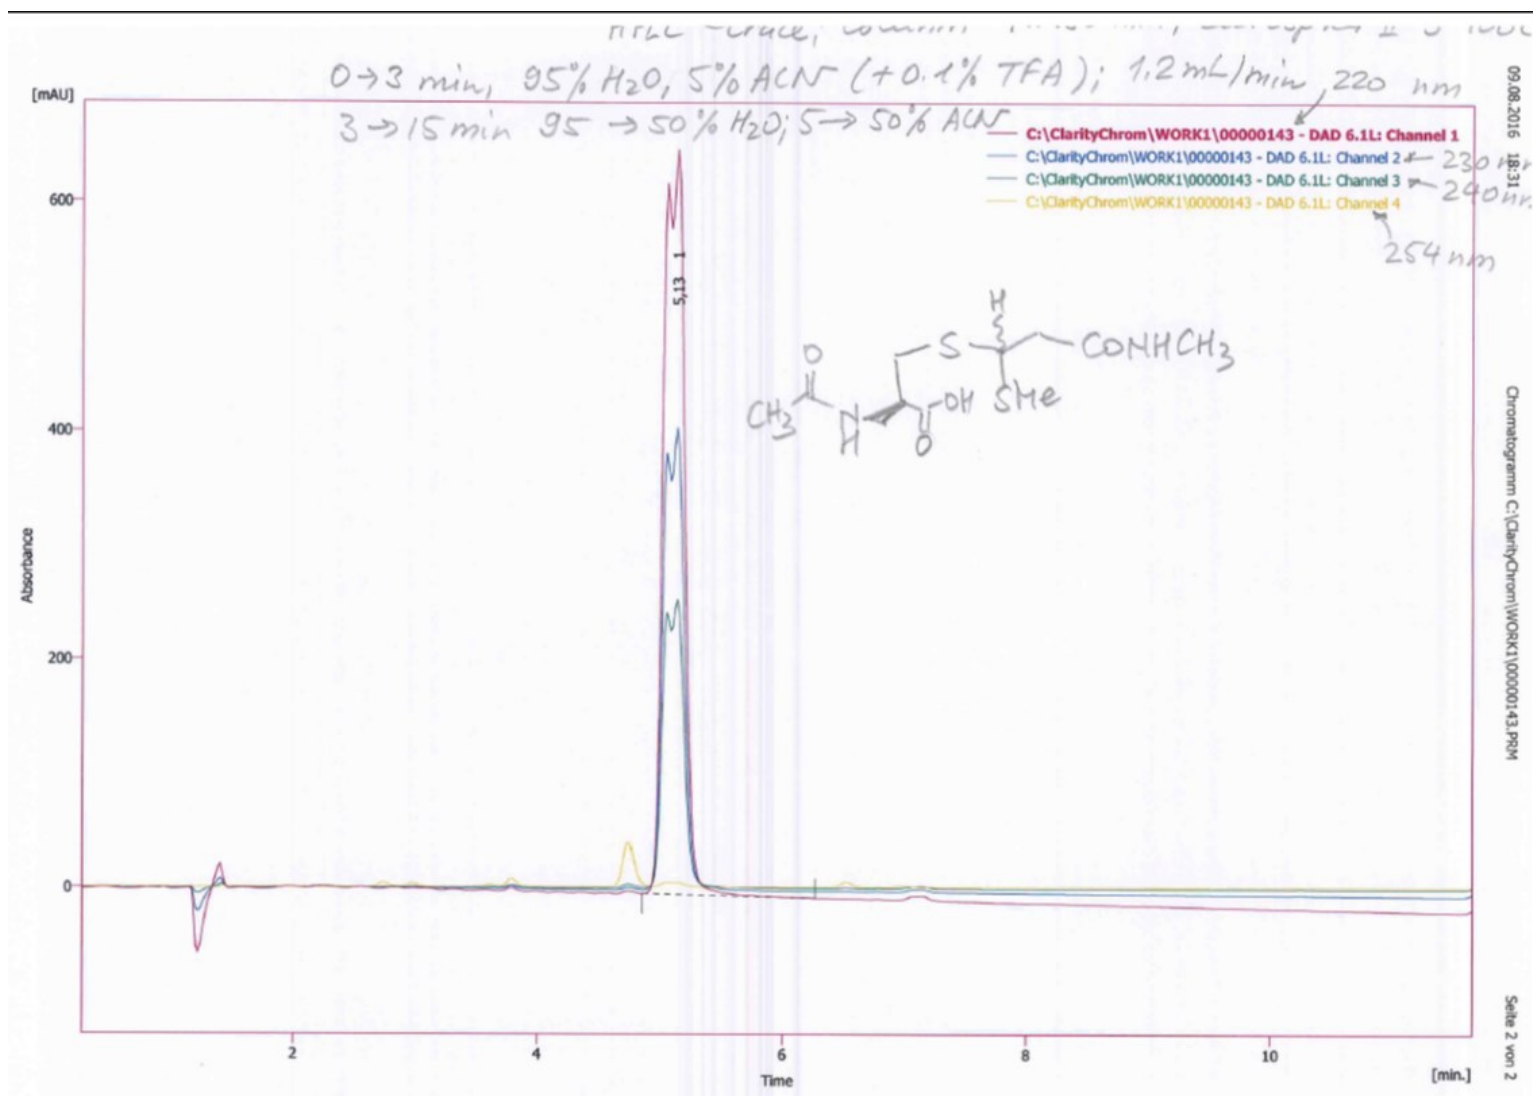

Supplemental File 3:  $^1\text{H}$ -NMR spectrum of synthesized D3-M-12

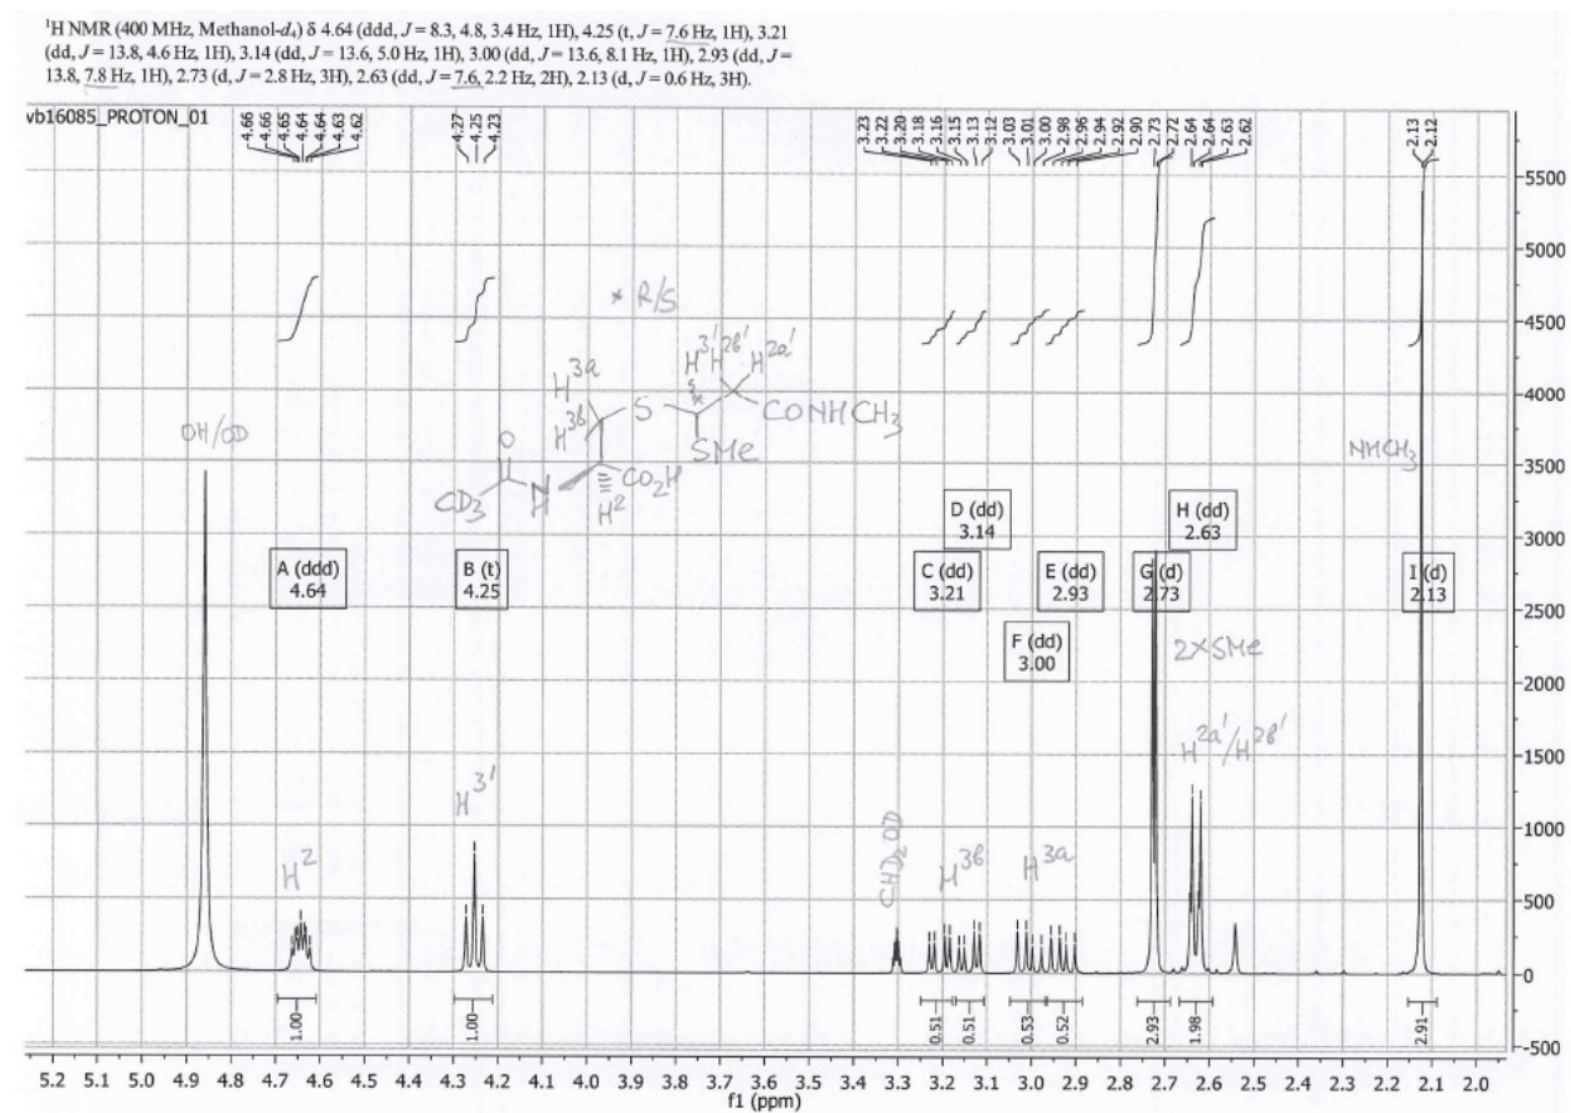

Supplemental File 4: HPLC-UV-chromatogram of synthesized D3-M-12

10/24/2016 4:28 PM Chromatogram C:\ClarityChrom\WORK1\Benoit\19vb-16085-5-50-ACN-15\_min-1.2\_mL\_16\_13\_24\_10\_2016.PRM

Page 2 of 9

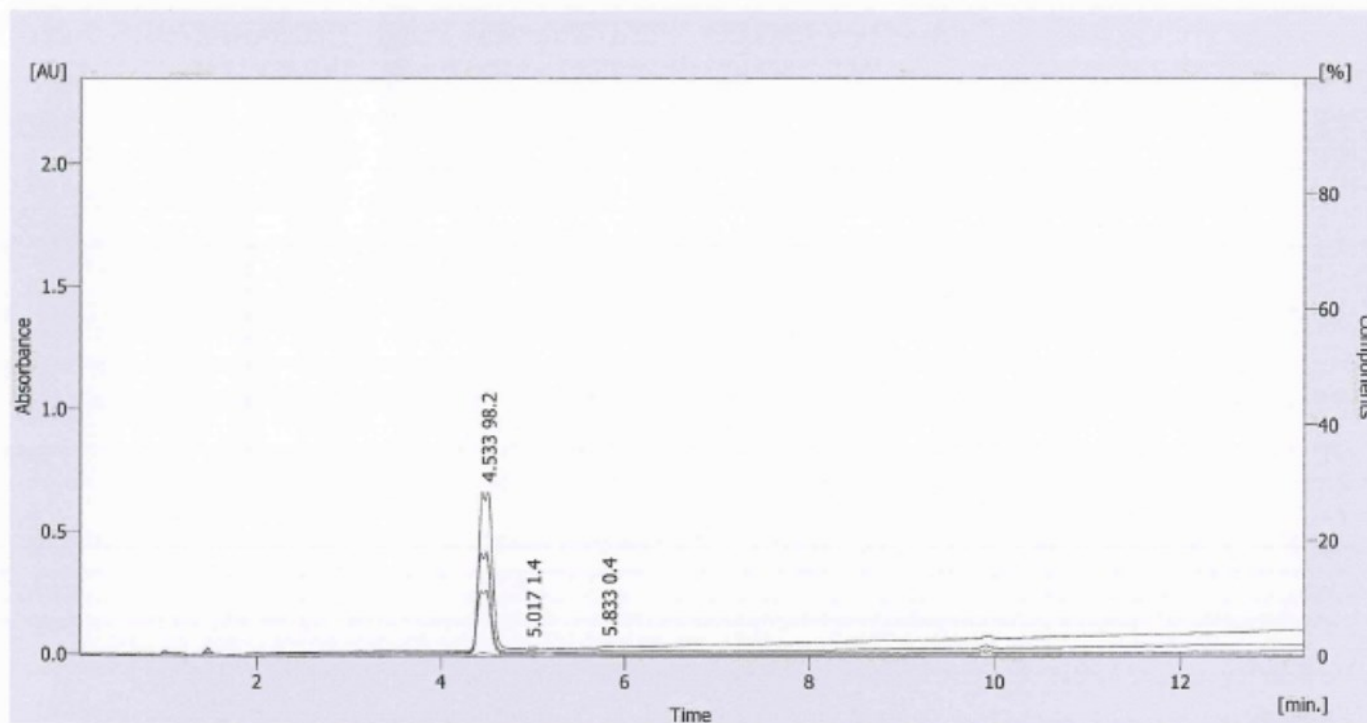

Result Table (Uncal - C:\ClarityChrom\WORK1\Benoit\19vb-16085-5-50-ACN-15\_min-1.2\_mL\_16\_13\_24\_10\_2016 - DAL

|   | Reten. Time<br>[min] | Area<br>[mAU.s] | Height<br>[mAU] | Area<br>[%] | Height<br>[%] | W05<br>[min] | PDA Peak<br>Purity | Compound Name |
|---|----------------------|-----------------|-----------------|-------------|---------------|--------------|--------------------|---------------|
| 1 | 4.533                | 6306.808        | 645.263         | 98.2        | 98.6          | 0.17         | 945                |               |
| 2 | 5.017                | 87.283          | 5.793           | 1.4         | 0.9           | 0.37         | 999                |               |
| 3 | 5.833                | 25.684          | 3.342           | 0.4         | 0.5           | 0.13         | 1000               |               |
|   | Total                | 6419.775        | 654.398         | 100.0       | 100.0         |              |                    |               |
