# Supplementary figures and images for: Quantification of a mercapturate metabolite of the biocides methylisothiazolinone and chloromethylisothiazolinone (“M-12”) in human urine using online-SPE-LC/MS/MS
Source: Royal Society of Chemistry journal article supplement (doi:10.1039/d1ay00183c), 2021-01-01

Figure S1: Chromatogram of a processed aqueous blank value

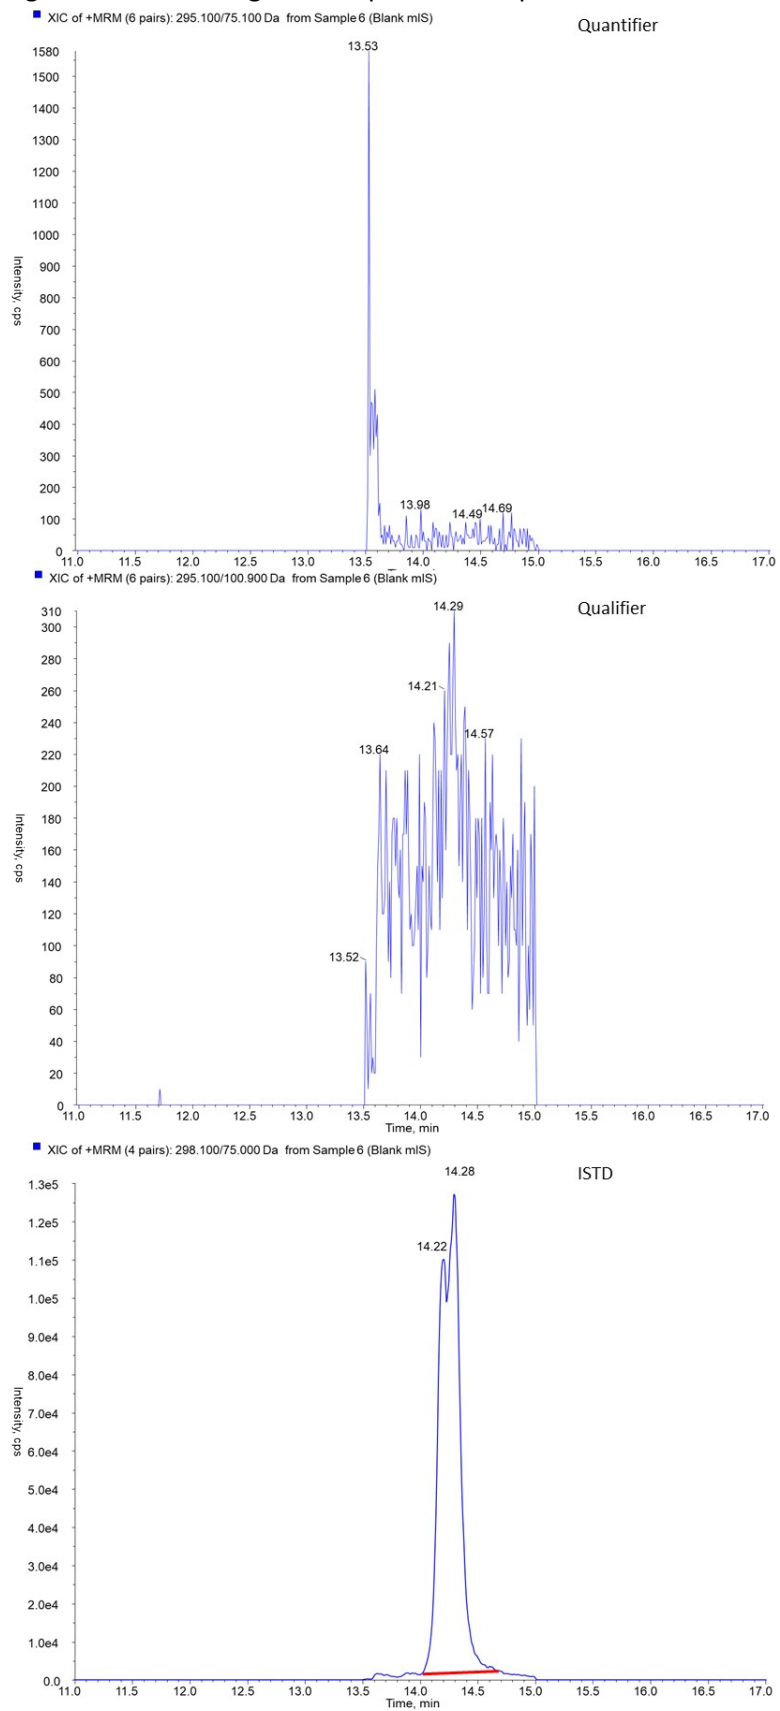

Supplement: d1ay00183c1.pdf [file d1ay00183c1.pdf]
